# Supplementary material for: Pancreatic fibrosis, acinar atrophy and chronic inflammation in surgical specimens associated with survival in patients with resectable pancreatic ductal adenocarcinoma
Source: PubMed Central journal article supplement (PMC8721973; doi:10.1186/s12885-021-09080-0), 2022-01-03
Supplement: 12885_2021_9080_MOESM2_ESM.pdf [file 12885_2021_9080_MOESM2_ESM.pdf]

A

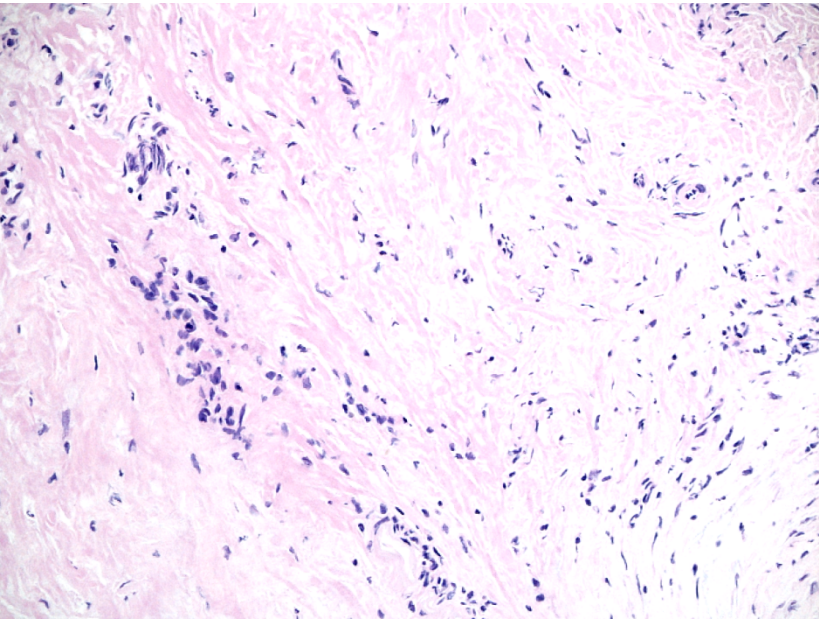

B

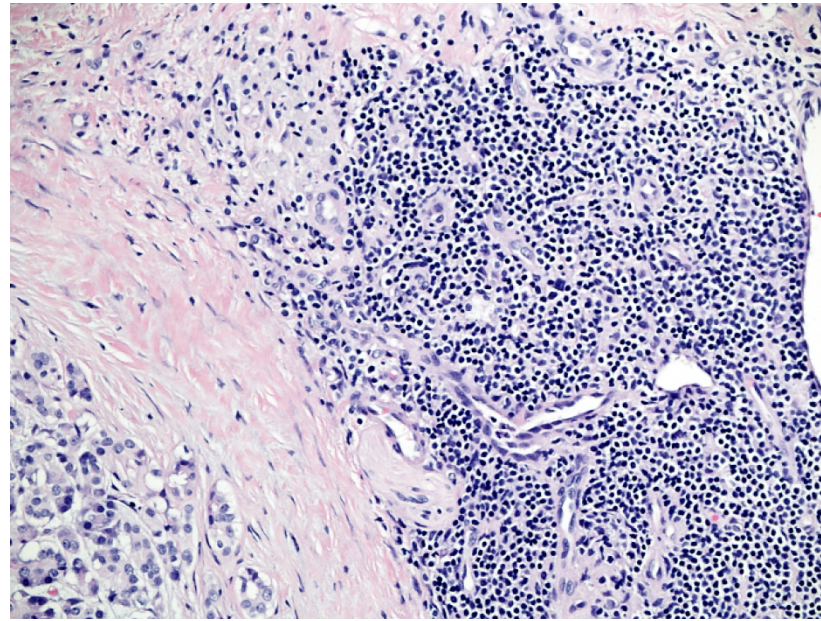

C

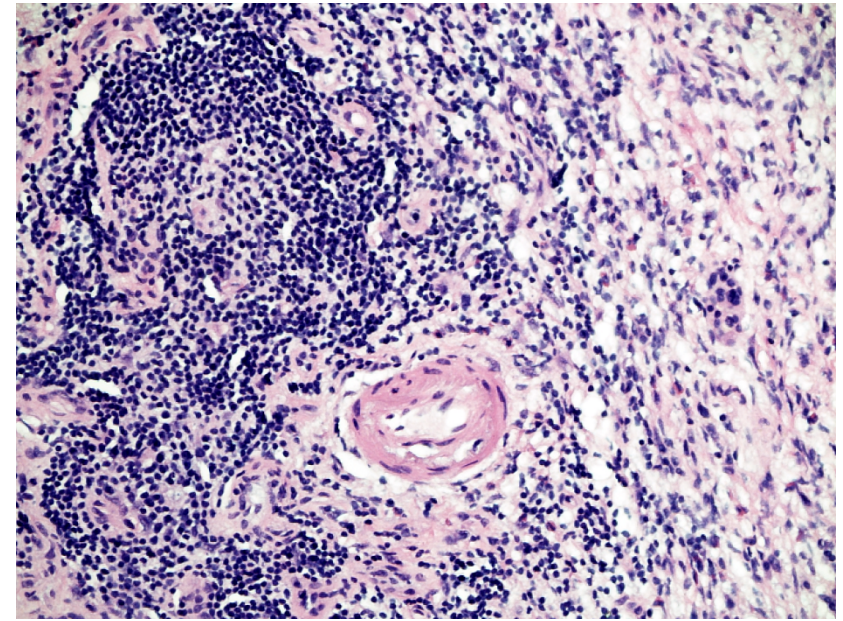

**Additional Figure 2.** Histological presentation of chronic inflammation. A. Mild chronic inflammation (H&E stain; 200X). B. Moderate chronic inflammation (H&E stain; 200X). C. Severe chronic inflammation (H&E stain; 200X).
